# Supplementary material for: Reproducibility and staging of 3D human retinal organoids across multiple pluripotent stem cell lines
Source: Oxford University Press journal article supplement (doi:10.1242/dev.171686), 2018-01-01
Supplement: dev171686supp.pdf [file dev171686supp.pdf]

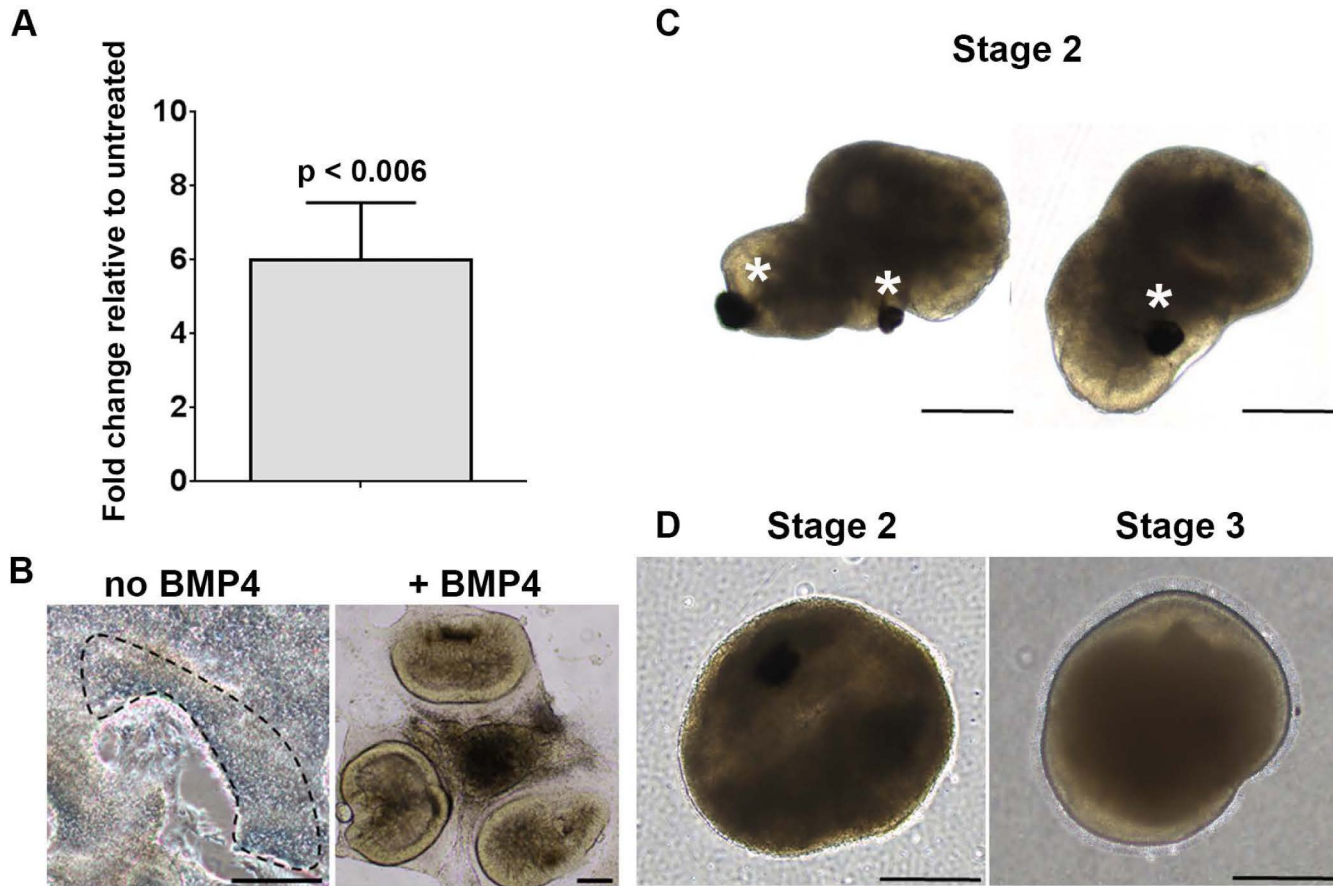

**Figure S1. Improvement in retinal organoid production across multiple hPSC lines using an early pulse of BMP4.** (A) Bar graph depicting the fold increase in mean retinal organoid production across seven hPSC lines relative to untreated lines. The  $p$ -value was calculated using a one sample Student's  $t$ -test against an untreated control mean of 1. (B) Plated EBs at d30 of retinal differentiation (immediately prior to dissection and transfer into suspension cultures) showing the difference in organoid-like structure between BMP4-treated and untreated cultures (scale bar = 100  $\mu$ m). (C) Live LM phase images of stage 2 d90 organoids showing clumps of RPE (denoted with asterisks) (scale bar = 50  $\mu$ m). (D) Live LM phase images of two representative d200 organoids from the same culture differentiation showing the coexistence of stage 2 organoids with no surface projections (left panel) and stage 3 organoids with surface projections (right panel) (scale bar = 50  $\mu$ m).

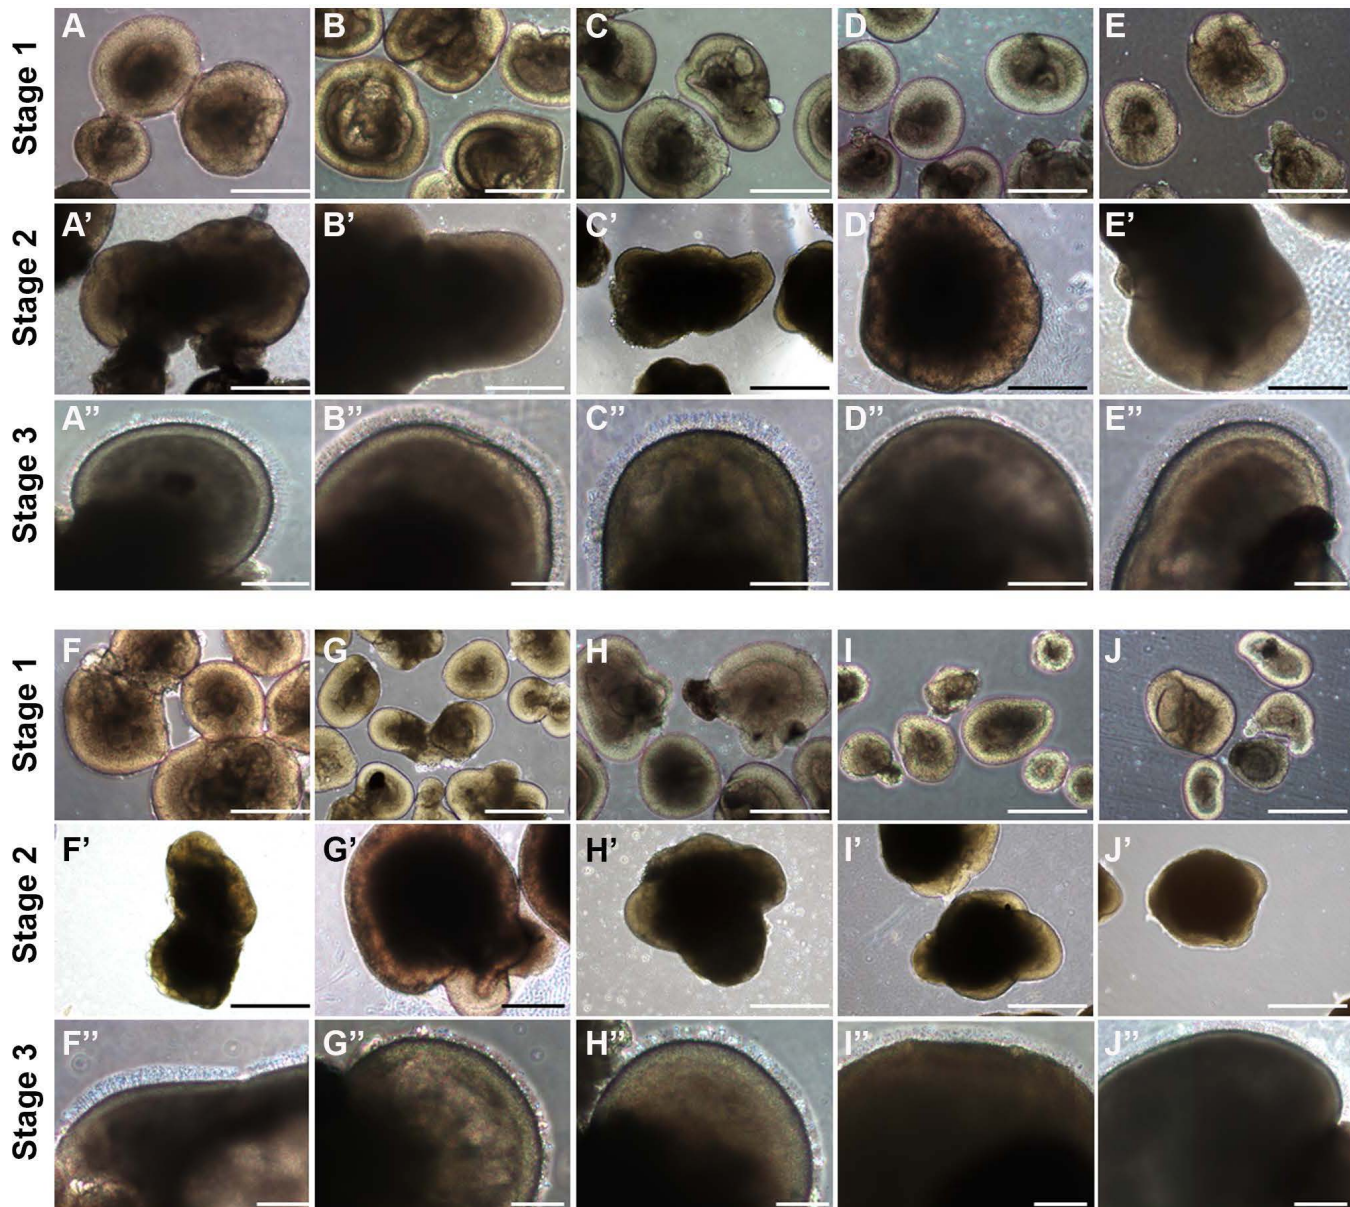

**Figure S2. Live LM phase images of the three distinct stages of retinal organoid morphology across 10 hPSC lines.** (A-J'') Representative images of stage 1, 2, and 3 organoids are shown for two gene-edited hiPSC lines (A-B''), one gene-edited hESC line (C-C''), four hiPSC lines for patients affected with inherited retinal degenerations (D-G''), and three wildtype hiPSC lines (H-J'') (scale bars = 250  $\mu$ m).

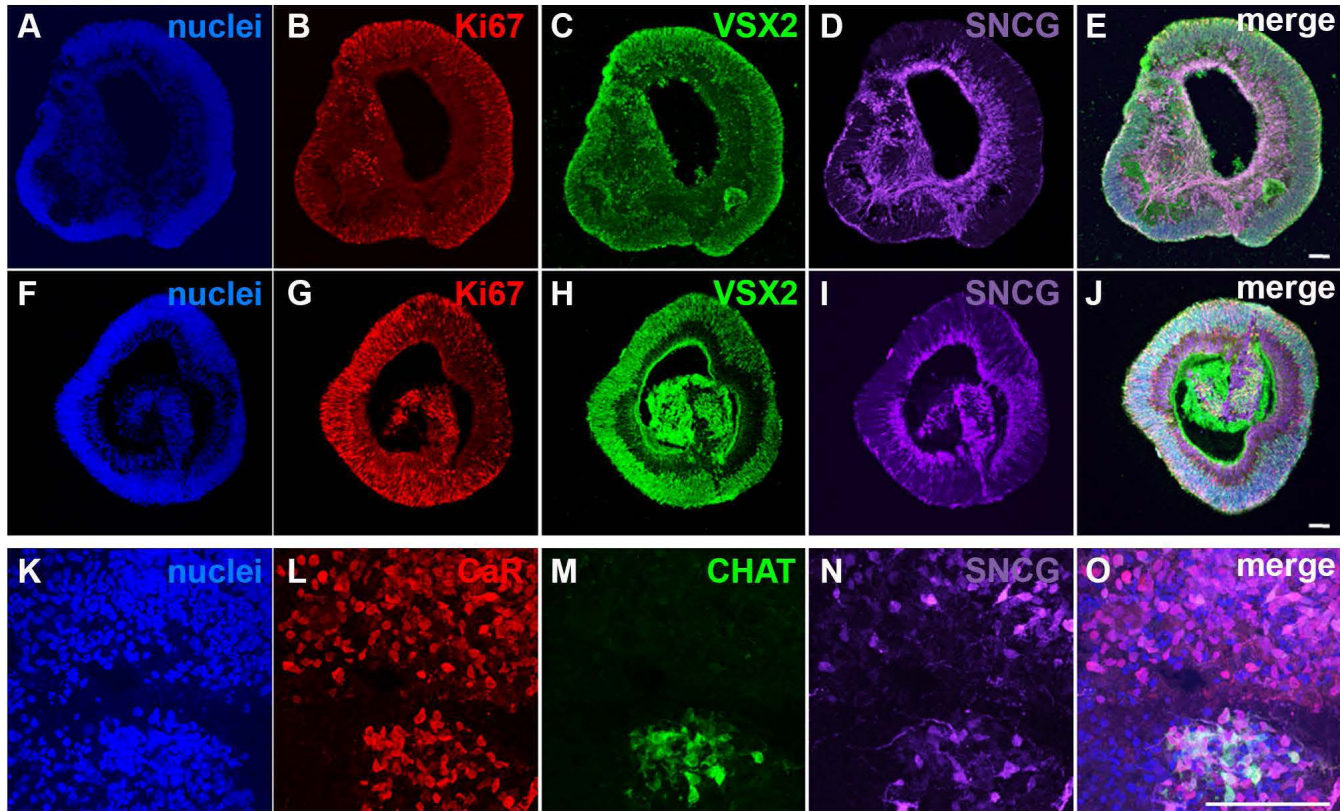

**Figure S3. Stage 1 organoid cell composition in additional hPSC lines. (A-J)** ICC images of d35 organoids from two additional hPSC lines showing Ki67+/VSX2+ proliferating NRPCs along the outer rim and SNCG+ RGCs on the inside of stage 1 organoids (scale bar = 100  $\mu$ m). **(K-O)** ICC images of a d35 stage 1 organoid from an additional hPSC line showing CHAT+ SACs among the SNCG+ RGCs and CaR+ ACs found at this stage (scale bar = 100  $\mu$ m).

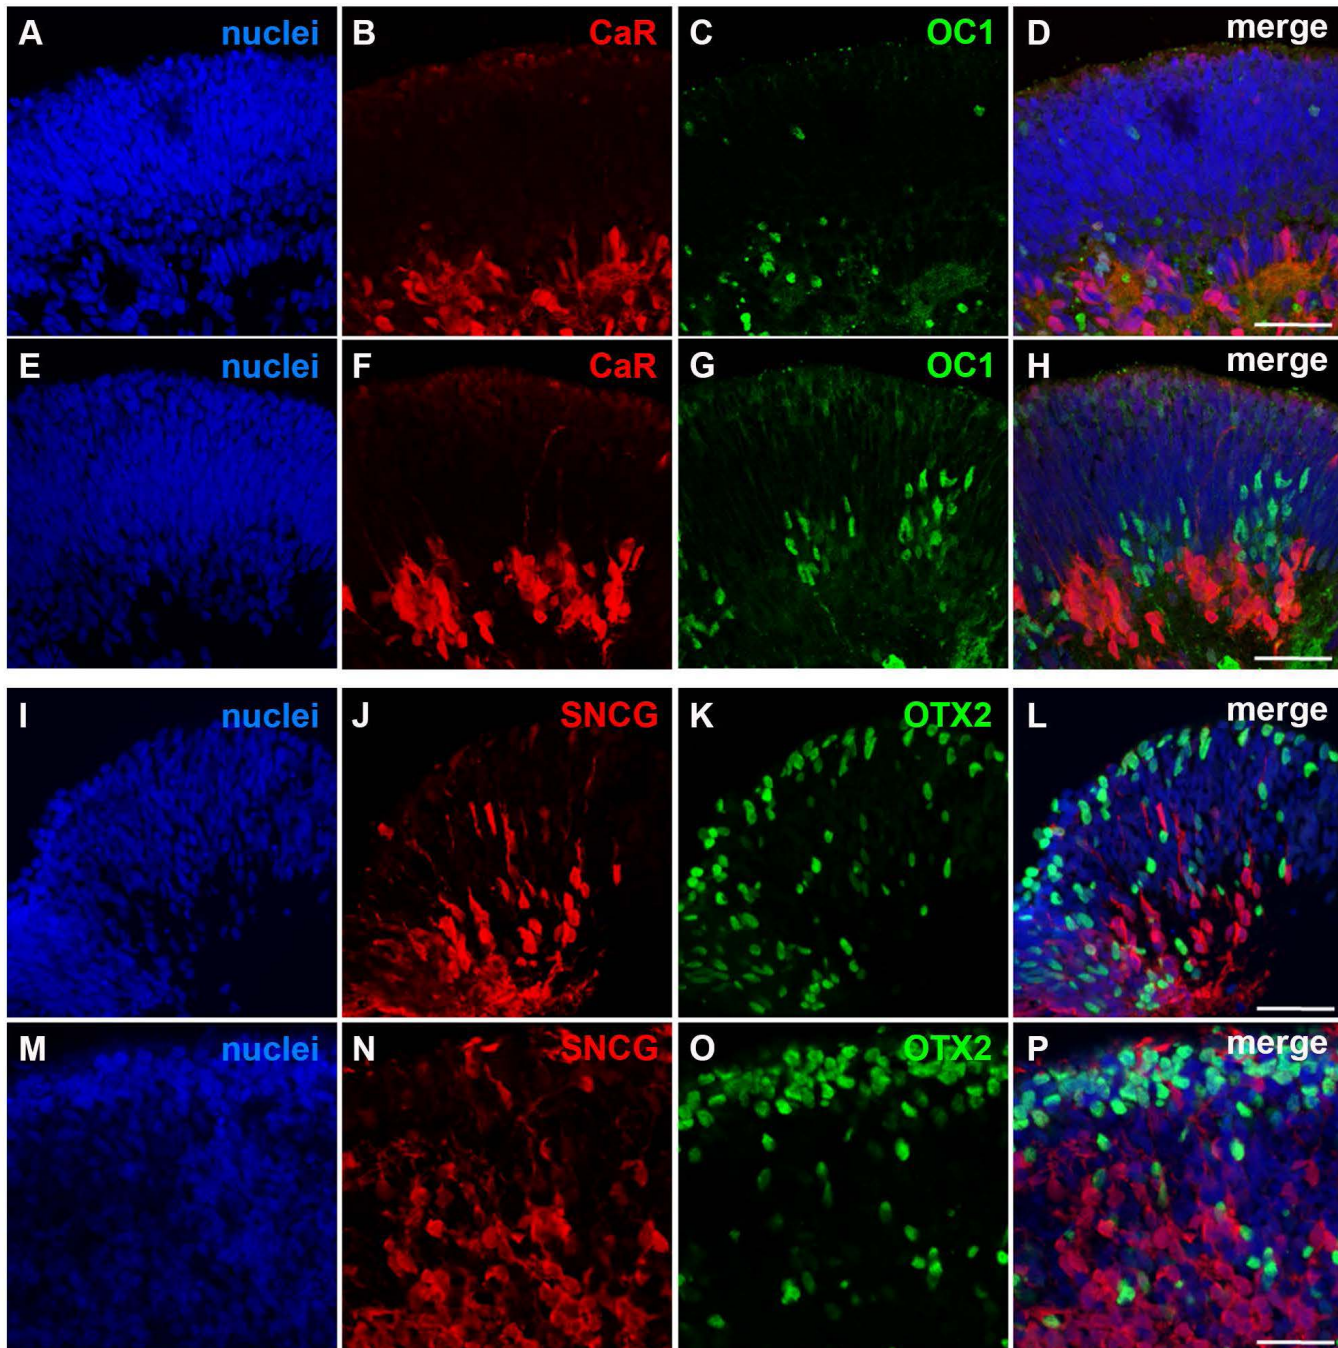

**Figure S4. Early stage 2 organoid cell composition in additional hPSC lines.** (A-H) ICC images of d80 stage 2 organoids from two additional hPSC lines showing the presence of CaR+ ACs and RGCs and OC1+ HCs. (I-P) ICC images of d74-d80 stage 2 organoids from two additional lines showing the presence of OTX2+ PR progenitors along the outer rim with SNCG+ RGCs located more internally (scale bars = 50  $\mu$ m).

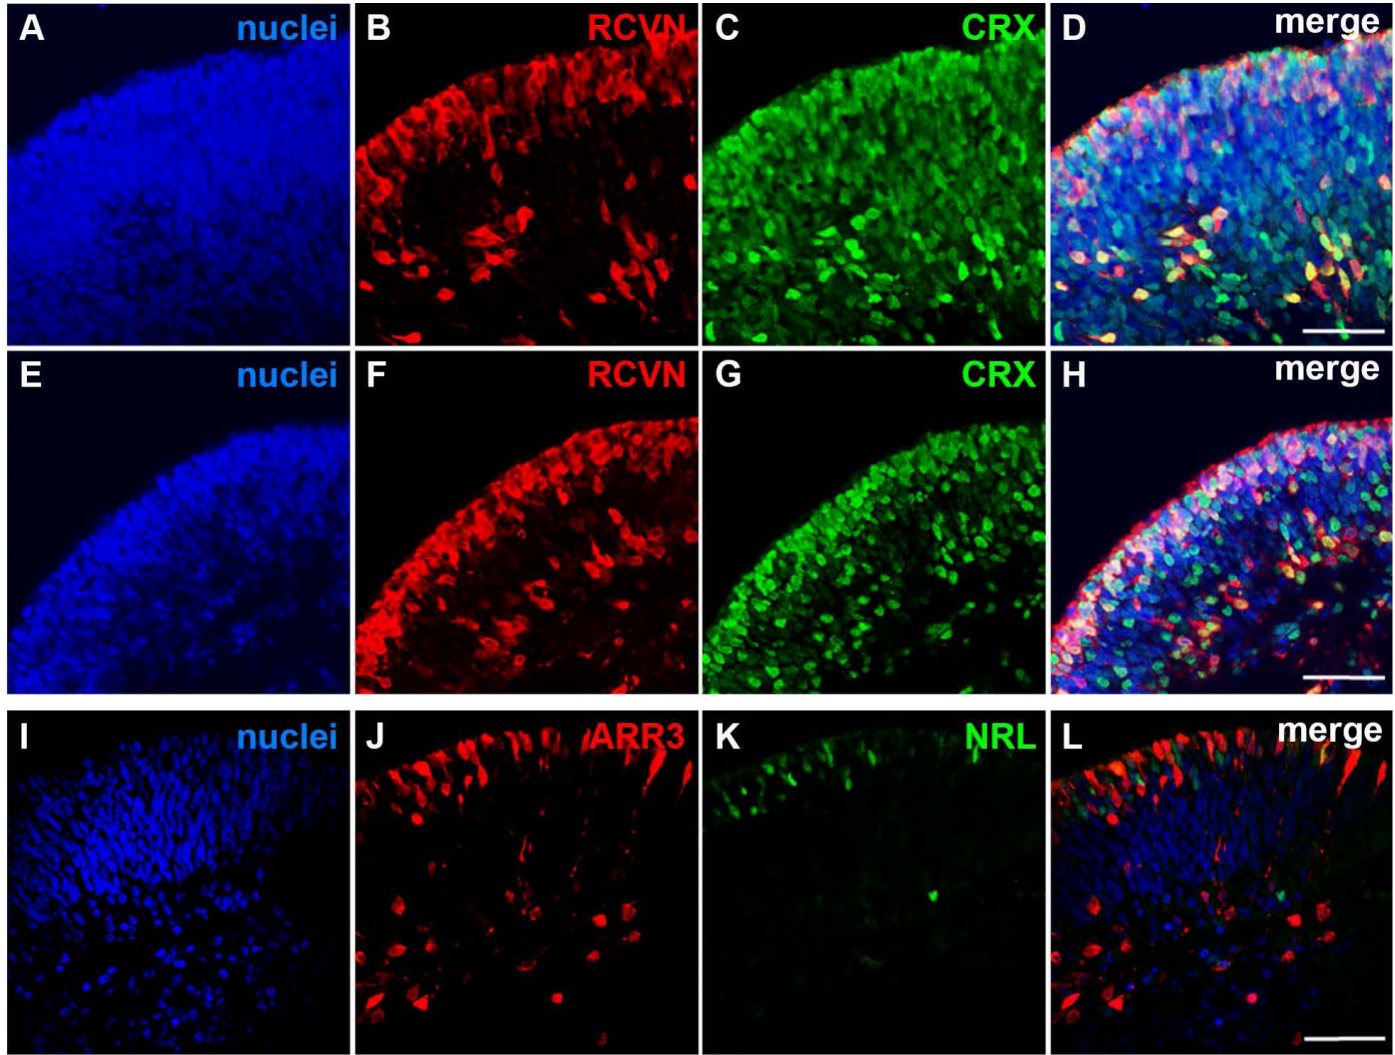

**Figure S5. Stage 2 organoid PR composition in additional hPSC lines.** (A-H) ICC images of d80 stage 2 organoids from two additional lines showing maturing RCVN+/CRX+ PRs predominantly near the surface. (I-L) ICC image of a d145 stage 2 organoid from an additional line showing the presence of maturing ARR3+ cones and NRL+ rods (scale bars = 50  $\mu$ m).

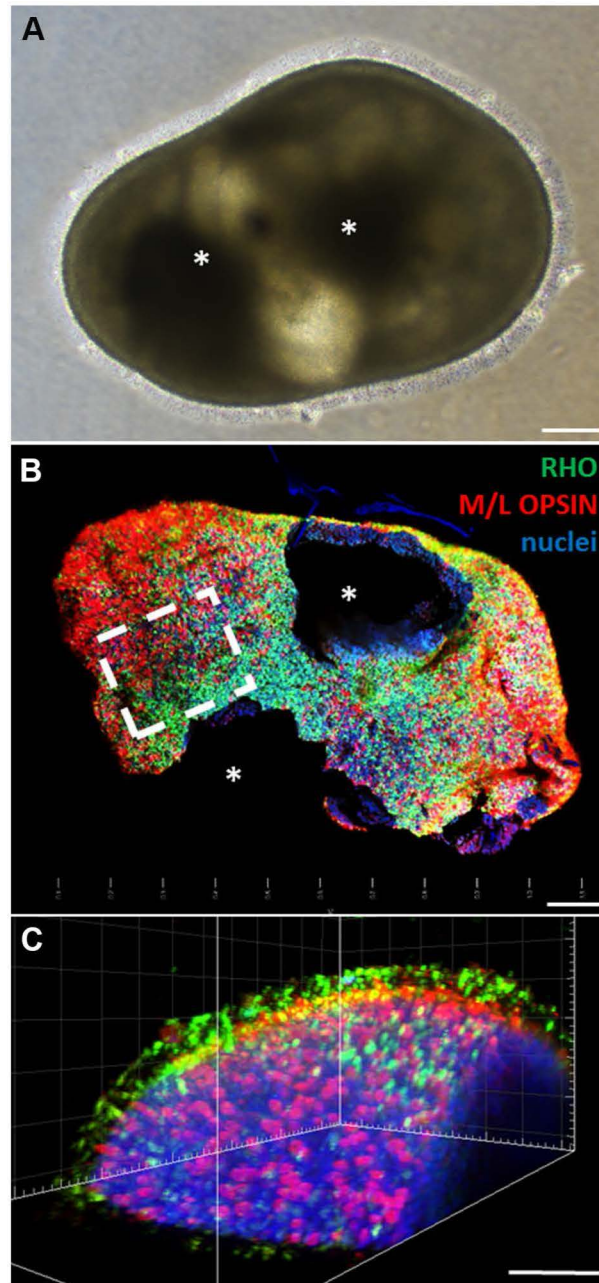

**Figure S6. Multiphoton 3D reconstruction of a stage 3 organoid from an additional line showing the surface distribution of rods and cones. (A)** Phase LM image of a d345 stage 3 organoid fixed for whole organoid immunostaining and multiphoton imaging. The asterisks mark attached RPE clumps. **(B, C)** Reconstructed multiphoton 3D image of the stage 3 organoid in panel A showing the surface distribution of RHO+ rods and M/L-OPSIN+ cones. The asterisks mark attached RPE clumps and the area within the dashed square is magnified in panel C (scale bars = 100  $\mu$ m).

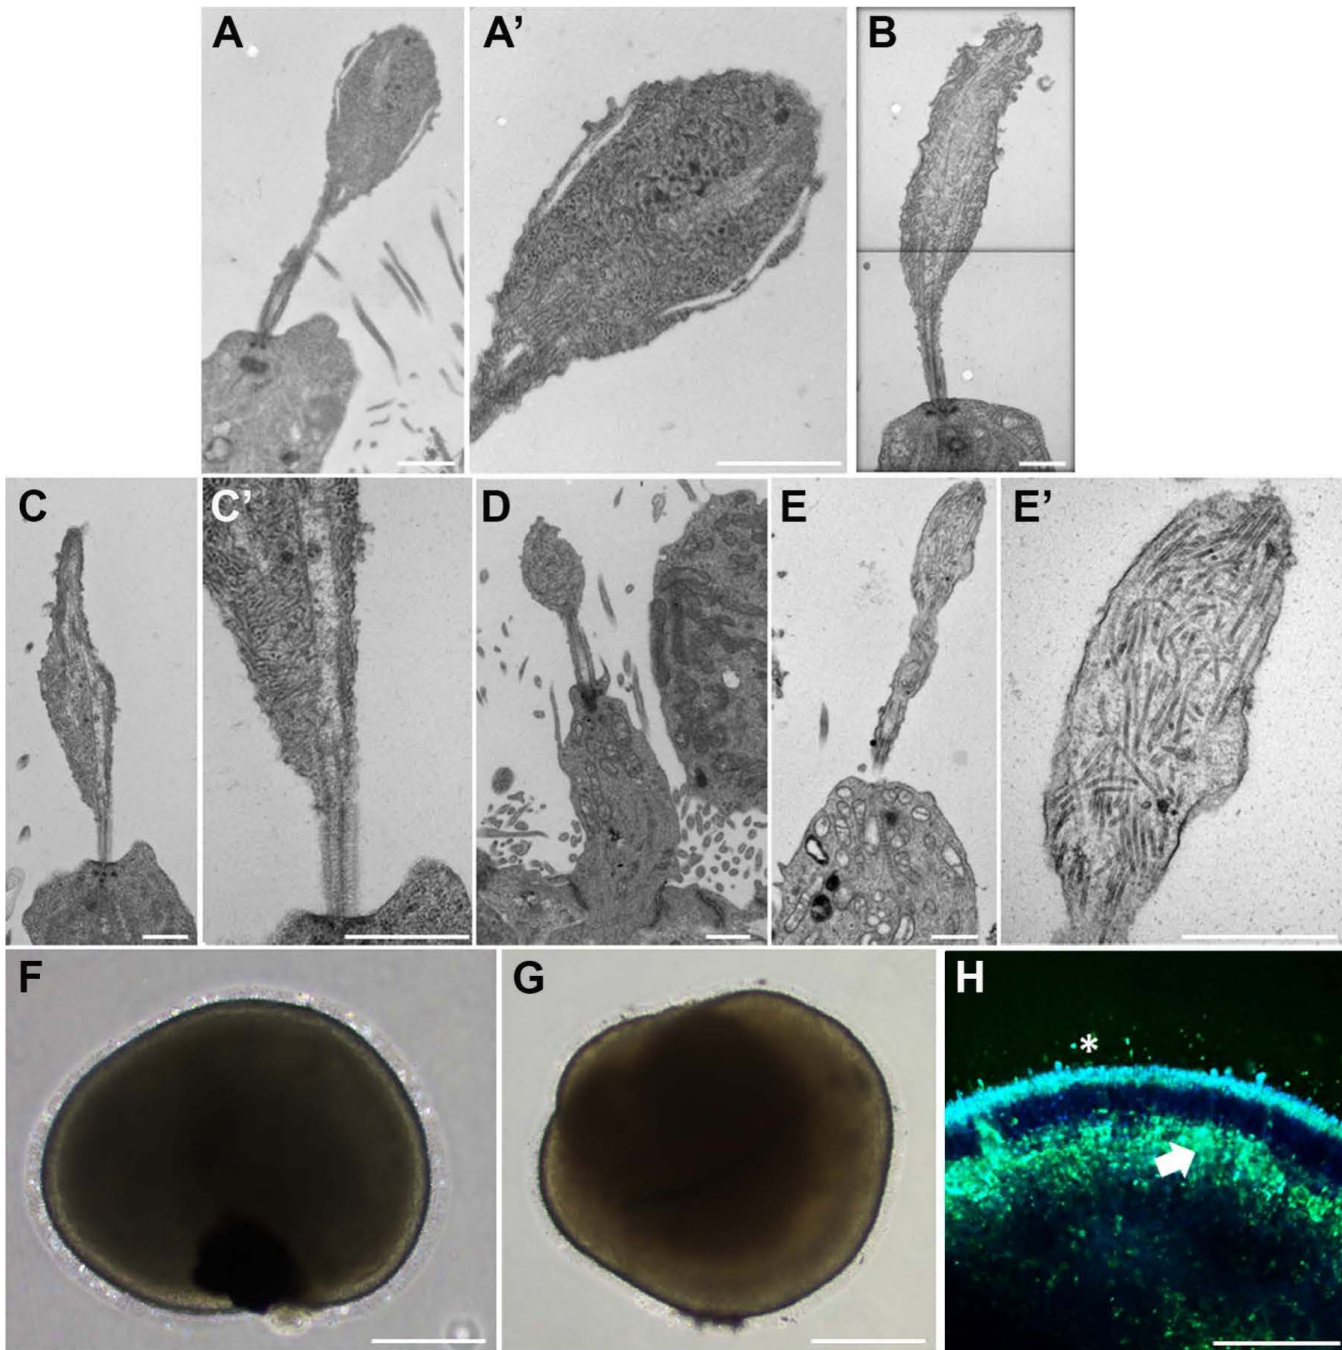

**Figure S7. Examination of outer segment morphology and inner segment metabolic activity across multiple stage 3 organoids.** (A-E') Electron micrographs of stage 3 organoid outer segments from five additional hPSC lines (scale bars = 800 nm). (F) LM image of the d250 stage 3 organoid shown in Figure 6M (scale bar = 150  $\mu$ m). (G, H) LM and optical metabolic imaging of a stage 3 organoid from an additional line showing metabolically active, NADP(H)-rich inner segments (blue) and retinol-containing regions (green) (scale bars: G = 200  $\mu$ m, H = 100  $\mu$ m).

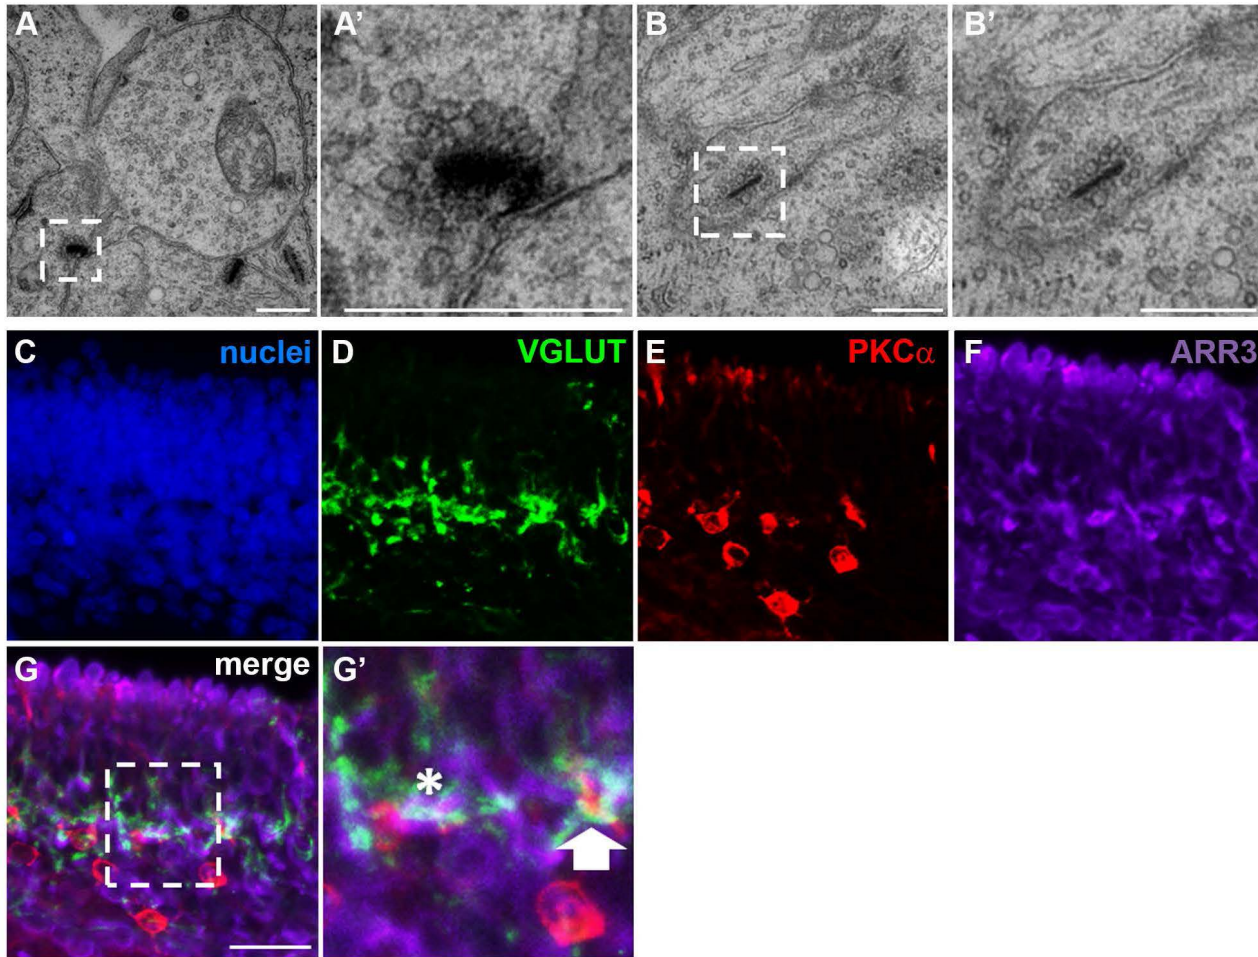

**Figure S8. Further demonstration of ribbon synapses and BPCs in stage 3 organoids. (A-B')**

Electron micrographs of stage 3 organoid ribbon synapses from two additional hPSC lines. Dashed boxes in panels A and B outline magnified regions shown in panels A' and B', respectively (scale bars = 500 nm). (C-G') ICC images from a d240 stage 3 organoid showing expression of the presynaptic marker VGLUT1 with ARR3 in cone pedicles (asterisk in G') and with the post-synaptic rod BPC marker PKC $\alpha$  (arrow in G'). Panel G' shows a magnification of the boxed region in panel G (scale bar = 25  $\mu$ m).

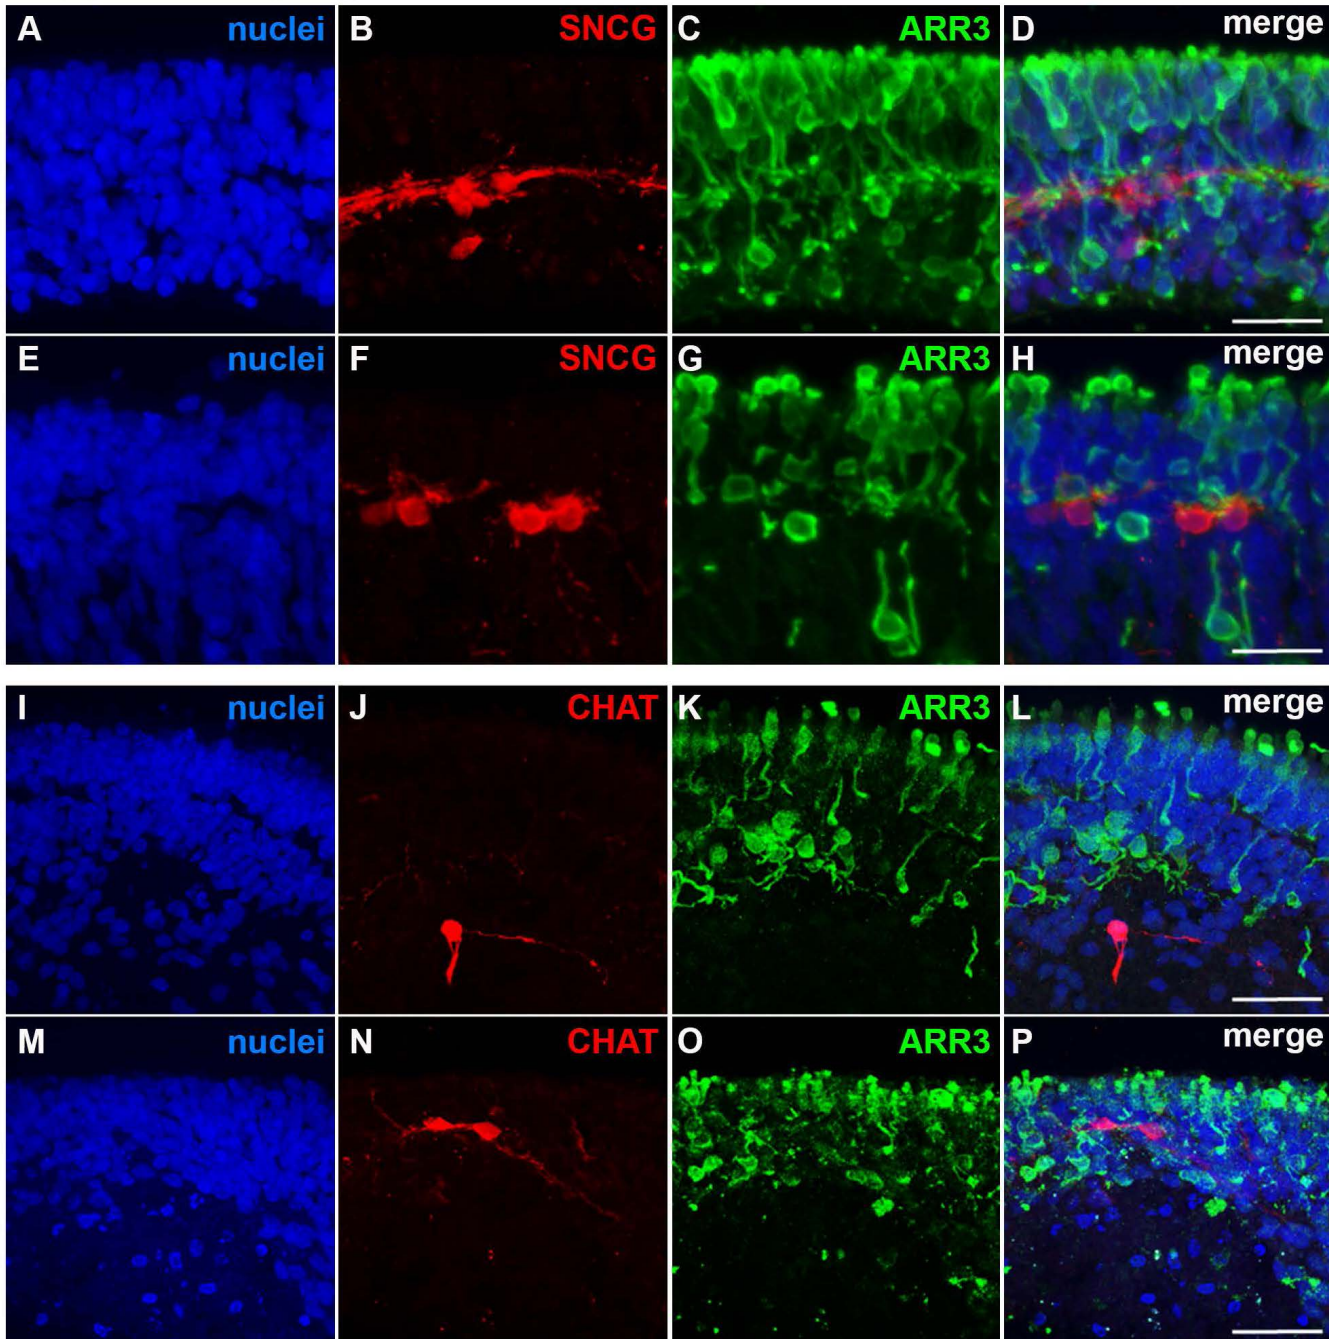

**Figure S9. Further demonstration of RGC and SAC loss within inner organoid layers in hPSC lines.** (A-H) RGC loss in stage 3 organoids from two additional hPSC lines (scale bar = 25 μm). (I-P) CHAT immunostaining showing the presence and morphology of rare SACs in stage 3 organoids from two additional hPSC lines (scale bar = 25 μm)

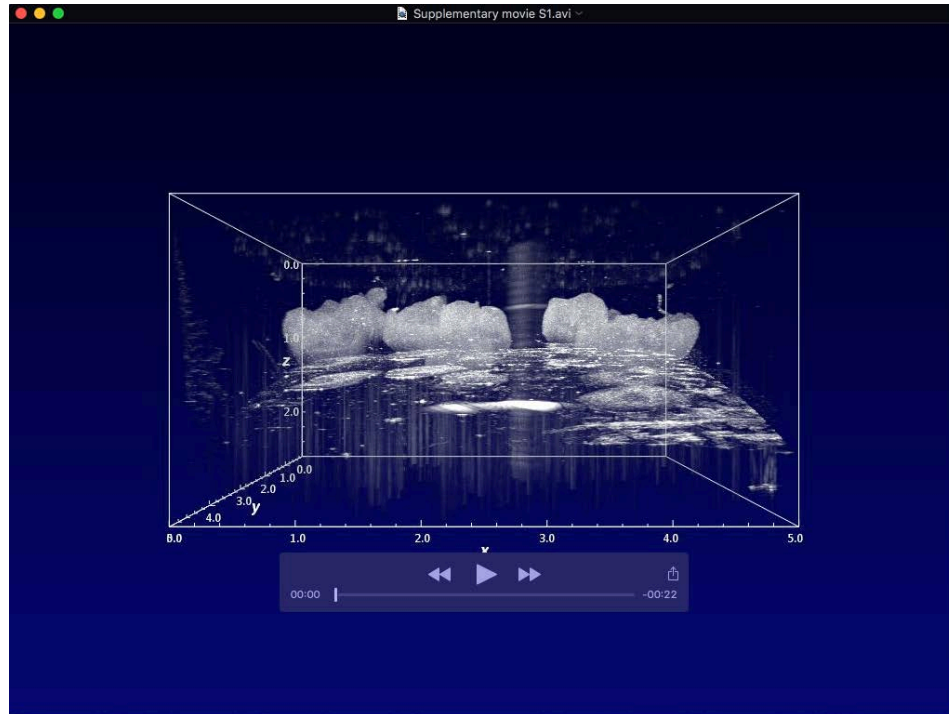

**Movie 1. OCT analysis of stage 1 organoids.** 3D OCT rendering of a group of stage 1 retinal organoids.

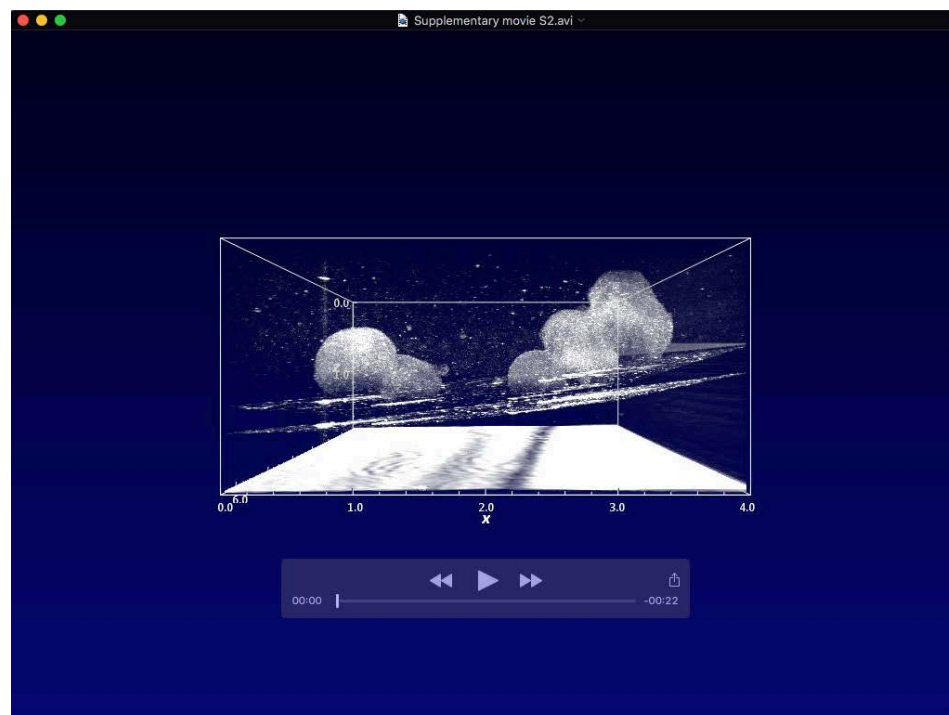

**Movie 2. OCT analysis of stage 2 organoids.** 3D OCT rendering of a group of stage 2 retinal organoids.

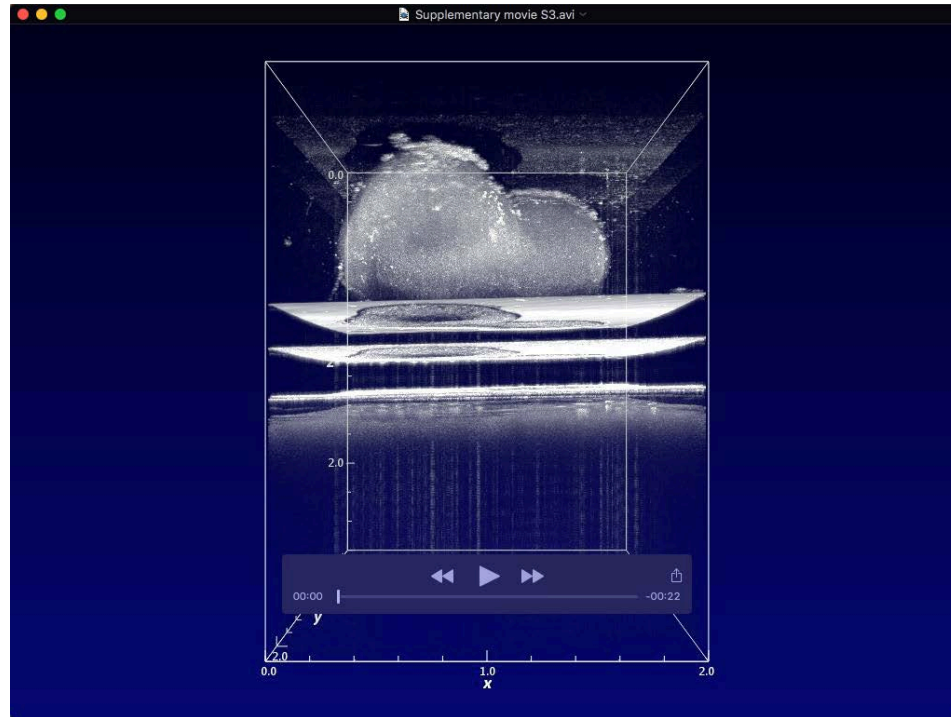

**Movie 3. OCT analysis of a stage 3 organoid.** 3D OCT rendering of a stage 3 retinal organoid.

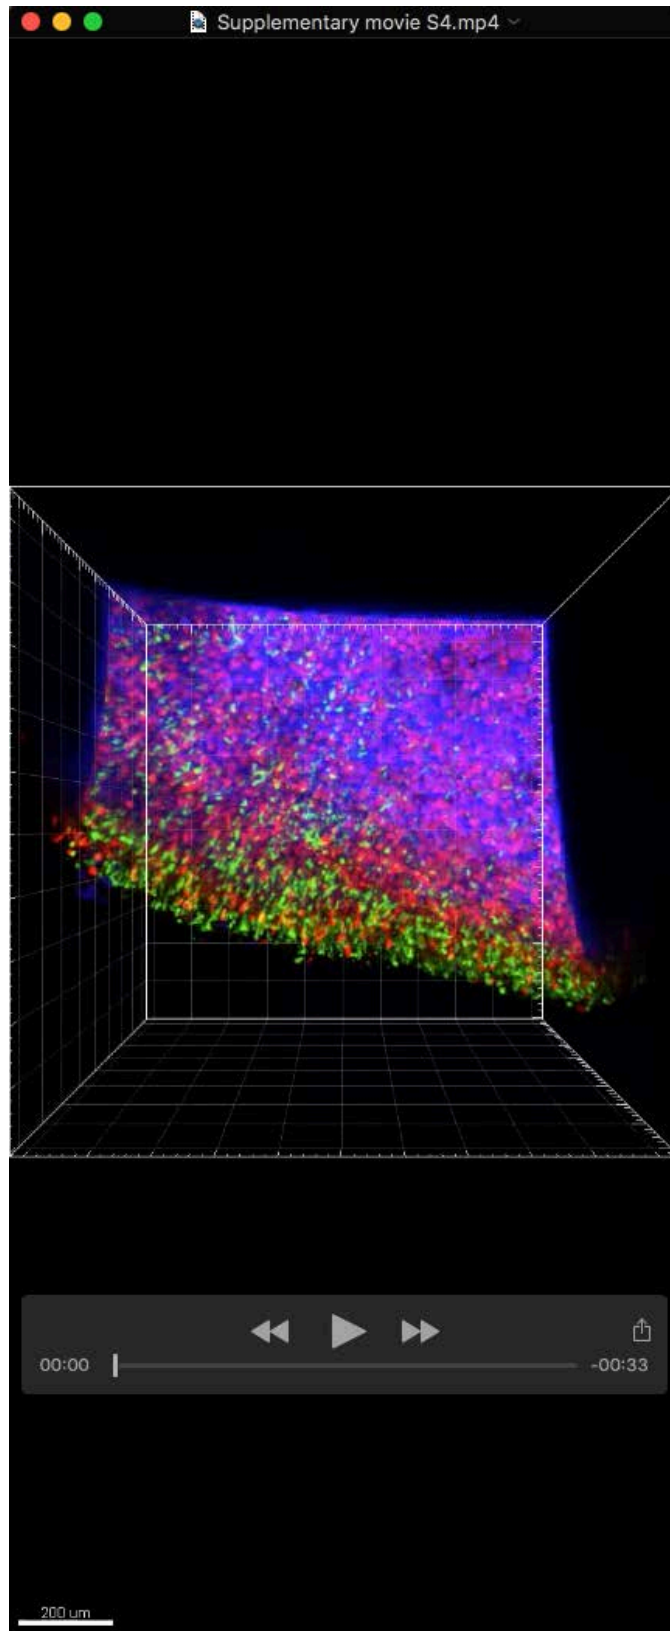

**Movie 4. Immunocytochemical analysis reveals non-uniform distribution of opsins in a stage 3 organoid.** 3D reconstruction of a multiphoton z stack showing the surface of a stage 3 (d241) retinal organoid, with expression of M/L OPSIN (red) and ROD OPSIN (green) relative to nuclei (blue).

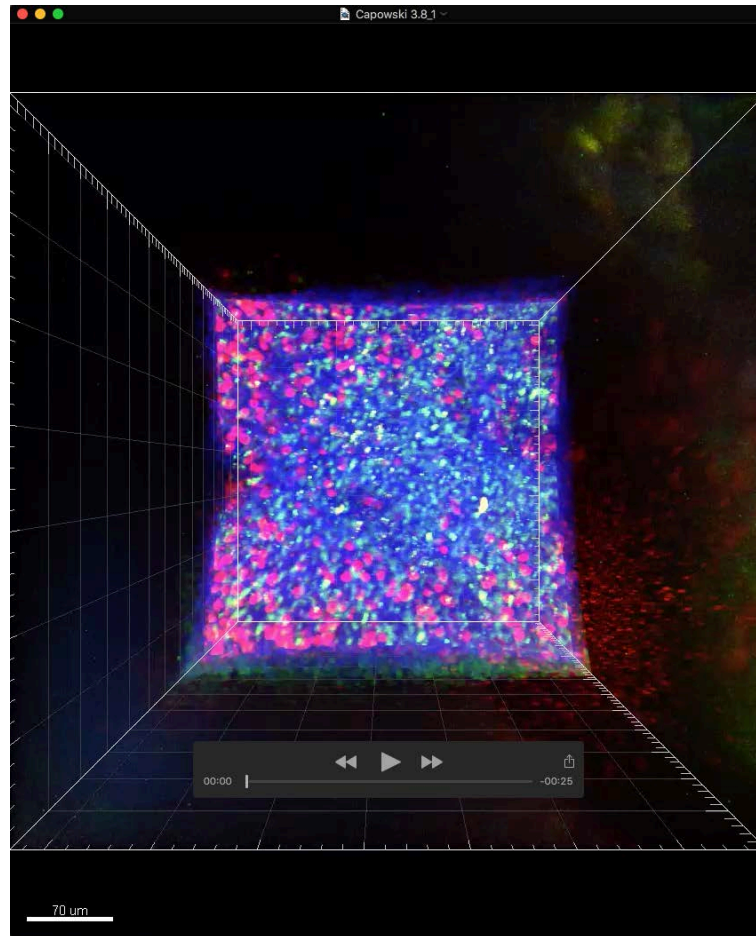

**Movie 5. Immunocytochemical analysis highlighting elongated photoreceptor outer segments in an advanced stage 3 organoid.** 3D reconstruction of a multiphoton z stack showing the surface of an older stage 3 (d345) retinal organoid, with expression of M/L OPSIN (red) and ROD OPSIN (green) relative to nuclei (blue).

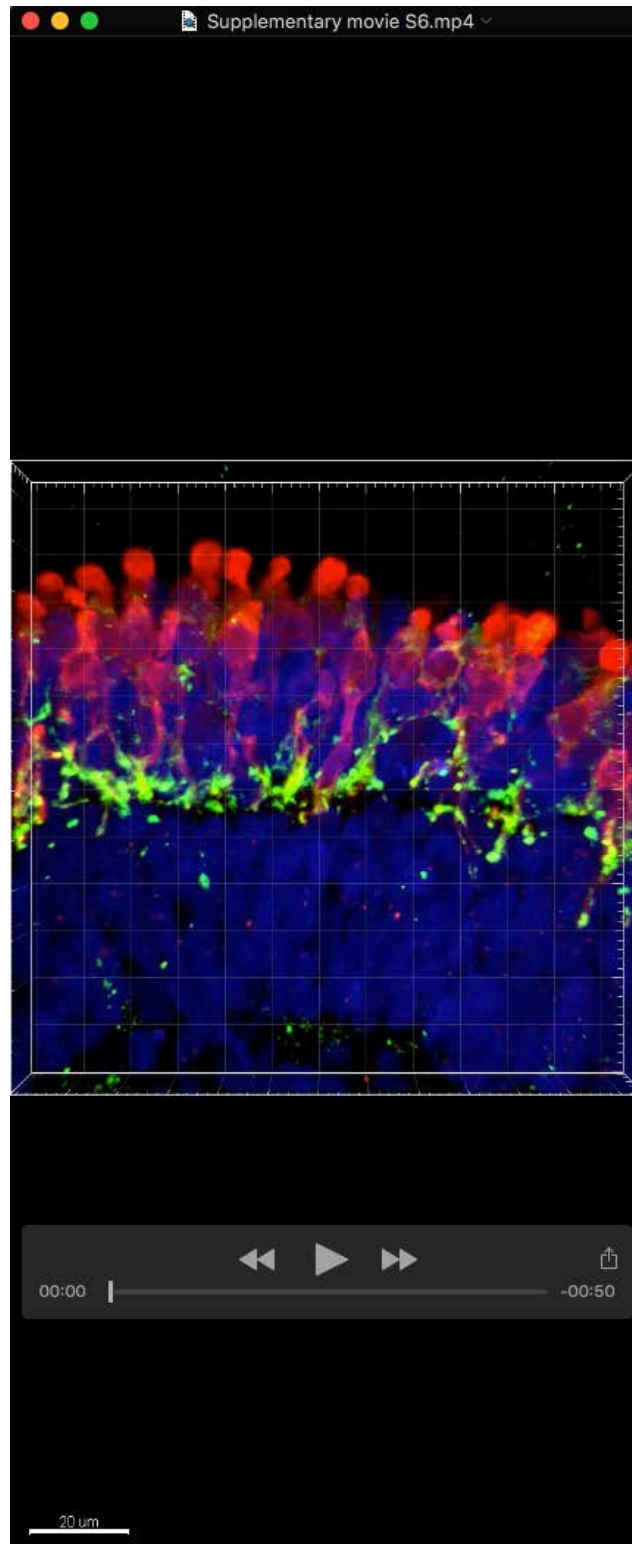

**Movie 6. Immunocytochemical analysis of stage 3 organoids demonstrating the presence of an outer plexiform-like layer.** 3D image of a confocal z stack of a thick section from a stage 3 retinal organoid showing expression of cone ARR3 (red) and the pre-synaptic marker VGLUT1 (green) relative to nuclei (blue).

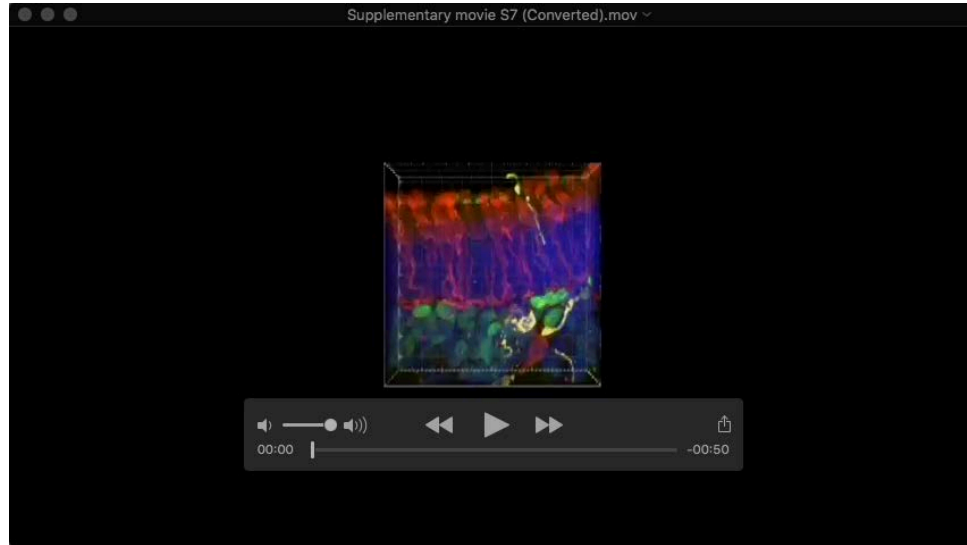

**Movie 7. Stage 3 organoids contain inner and outer nuclear layers with appropriate cell types.** 3D reconstruction of a confocal z stack of a thick section from a stage 3 retinal organoid showing expression of cone ARR3 (red), ROD OPSIN (yellow) and VSX2 (bipolar cells; green) relative to nuclei (blue). Note the presence of pedicles associated with the ARR3+ cone axons vs. spherules associated with the ROD OPSIN+ rod axons present within the ONL of this organoid.

**Table S1: Primary antibodies**

| Antibody                                | source         | catalog number | dilution |
|-----------------------------------------|----------------|----------------|----------|
| ARL13b                                  | Protein Tech   | 11711          | 1:500    |
| Cone arrestin (ARR3)                    | Novus          | NBP1-37003     | 1:200    |
| Cone arrestin (ARR3)                    | LS Bio         | LS-C368677     | 1:300    |
| Calretinin (CaR)                        | Millipore      | AB5054BD       | 1:500    |
| CHAT                                    | Millipore      | AB144P         | 1:100    |
| CRALBP                                  | Abcam          | AB15051        | 1:250    |
| CRX                                     | Abnova         | H0001406-M02   | 1:1000   |
| C-terminal binding protein 2 (CTBP2)    | BD Biosciences | BD 612044      | 1:300    |
| G0 $\alpha$                             | Millipore      | MAB3073        | 1:700    |
| Ki67                                    | Abcam          | ab15580        | 1:100    |
| NR2E3                                   | Abcam          | ab172542       | 1:300    |
| NRL                                     | R&D Systems    | AF2945         | 1:300    |
| Onecut1 (OC1)                           | R&D Systems    | AF6277         | 1:300    |
| Opsin ML                                | Millipore      | AB5405         | 1:500    |
| Opsin S                                 | Millipore      | AB5407         | 1:500    |
| OTX2                                    | R&D Systems    | AF1979         | 1:200    |
| Pericentrin (PCN)                       | Abcam          | ab28144        | 1:500    |
| PKC $\alpha$                            | Sigma          | P4334          | 1:50     |
| Recoverin (RCVN)                        | Millipore      | AB5585         | 1:2000   |
| Rhodopsin (RHO)                         | Millipore      | MABN15         | 1:100    |
| RFP (tdTomato)                          | Rockland       | 600-401-378    | 1:300    |
| tdTomato                                | Sicgen         | AB8181-200     | 1:300    |
| Synuclein $\gamma$ (SNCG)               | Abnova         | H00006623-M01A | 1:500    |
| Vesicular glutamate transporter (VGLUT) | Millipore      | AB5905         | 1:2000   |
| VSX2                                    | Exalpha        | X1179P         | 1:200    |
